# Supplementary material for: A membrane‐associated NAC transcription factor OsNTL3 is involved in thermotolerance in rice
Source: PubMed Central journal article supplement (PMC7152603; doi:10.1111/pbi.13297), 2019-12-06
Supplement: PBI-18-1317-s002.pdf [file PBI-18-1317-s002.pdf]

**Table S1. Primers Used in This Study.**

| Name                      | Locus          | Forward primer (5'-3')            | Reverse primer (5'-3')            | Purpose                     |
|---------------------------|----------------|-----------------------------------|-----------------------------------|-----------------------------|
| Pro:BiP2                  | LOC_Os03g50250 | CCGGAAATTCATATTCGGCCCTCGTCGCCTCGC | CGGGGTACCCTTCTTGCTCTGCTCATGCA     | Over-expression             |
| Pro:BiP4                  | LOC_Os05g35400 | GAATTCGACATCAGGCAGGCCGTGAAC       | GGTACCGATCGTCTGCTTCCGCTTTGG       | Over-expression             |
| CC15640F1                 | LOC_Os01g15640 | GTGTGTATATACAAGCATGAACCA          | AAACTGGTTCATGCTTGTATATAC          | CRISPR-CAS9                 |
| CC15640F2                 | LOC_Os01g15640 | GTGTCAGGCTGTTCCGGATGCTCGA         | AAACTCGAGCATCCGAACAGCCCTG         | CRISPR-CAS9                 |
| 1564-deltaN F             | LOC_Os01g15640 | GGGAGATCTGATACGGAGTACTTGTGTCC     | CGTCGACTAATTATCAGCAGCTTCATTCGA    | Yeast self-activation assay |
| 1564full-R                | LOC_Os01g15640 | GTTCCTCCGGGATGGAGTCTTTACGTGACATG  | CGTCGACTAGGATAGCTGCTGATCTCTC      | Yeast self-activation assay |
| 1564R7                    | LOC_Os01g15640 | GTTCCTCCGGGATGGAGTCTTTACGTGACATG  | CGTCGACTATCGAGCATCCGAACAGCCCTG    | Yeast self-activation assay |
| 1564R4                    | LOC_Os01g15640 | GTTCCTCCGGGATGGAGTCTTTACGTGACATG  | CGTCGACTAATTATCAGCAGCTTCATTCGA    | Yeast self-activation assay |
| CC1564N2Y2                | LOC_Os01g15640 | GGCAGATCTCGATGGAGTCTTTACGTGACATGG | GCCCTGCAGCTAGCTGGCGAGAACAAAAGTC   | Yeast self-activation assay |
| pETMalc-H-NL3deltaC       | LOC_Os01g15640 | GCCTCGAGATGGAGTCTTTACGTGACATG     | GCCTCGAGCTACTGAATTCACCTCCAAACATCG | Protein Purification        |
| bZIP74-UB                 | LOC_Os06g41770 | GCCGTACTCACGGAAACCCT              | CTAGCAAGCAGCTGCTGCTAAA            | qRT-PCR                     |
| bZIP74-SB                 | LOC_Os06g41770 | CCATGCAGGAGTCTGCCGCTG             | CTAGCAAGCAGCTGCTGCTAAA            | qRT-PCR                     |
| OsCRT                     | LOC_Os03g61670 | AGAGGCTTGAGGAGGAATCTGC            | CTGATTCAGTTGCCCTCTCGTC            | qRT-PCR                     |
| OsCRT3A                   | LOC_Os01g67054 | GTGACGATCCGGAATATGCAAG            | CCAGTCTCTCTAGGAAGAAAG             | qRT-PCR                     |
| OsPDL2-3                  | LOC_Os09g27830 | GAGAAAGCAAGTTGGAGTTGGTG           | CCGCCAAAATTGTACAGTTGAC            | qRT-PCR                     |
| OsBiP1                    | LOC_Os02g02410 | AAGAAAGGTGAAGGAGCGGAT             | ATTGGCTGTCTCTTTGAATC              | qRT-PCR                     |
| OsHSP                     | LOC_Os02g52150 | GTGCTCAAGGTGGTCTGTGCC             | CCAAAACCTTTTATCTCCATAACT          | qRT-PCR                     |
| NAC protein               | LOC_Os05g34830 | TGCAGAGCCAGCCCAAGATC              | GCTTGCCCAAGTACATGAGG              | qRT-PCR                     |
| zinc finger protein ZAT8  | LOC_Os01g62190 | TCGGAGCCTGAGTTACTTAA              | CATCACCTCCAAAATTTAG               | qRT-PCR                     |
| RAP2-12                   | LOC_Os03g08460 | CGAGCAGCCATGACGATCAA              | ACAGGGGCACCATGTTTCTG              | qRT-PCR                     |
| ZAT12                     | LOC_Os05g02390 | TCGACCTGAACCATCCACCT              | ATCCGGCAAGAGAGCTAGT               | qRT-PCR                     |
| calmodulin-like protein 4 | LOC_Os03g53200 | GTTTTATCTCCCAACTGAG               | ATTATCTAGTTCACCTGCC               | qRT-PCR                     |
| EN3                       | LOC_Os07g48630 | ATTTCTTACCCGGCAGCTC               | AGTTGGATCCGGGCTACTC               | qRT-PCR                     |
| Os06g0622700              | LOC_Os06g41770 | CGAGGATCTTGTCTTTCGG               | CTCTTCGACGGAGTGTAGCC              | ChIP-qPCR                   |
| Os01g0839100              | LOC_Os01g62190 | CTCTGTGGAGCCAGTCGAA               | GCACACATGTTTATCTCG                | ChIP-qPCR                   |
| Os03g0182800              | LOC_Os03g08460 | ACCTGCAACCAACTTTTGGC              | ATGTGGGATGGGCTGTCTA               | ChIP-qPCR                   |
| Os07g0685700              | LOC_Os07g48630 | CGGAGGTACGACAGCAT                 | GTGGTATCTCTCTCTGCG                | ChIP-qPCR                   |
| Os01g0328400              | LOC_Os01g22490 | ACCACCTTTCGAACGCCACTACT           | ACGCCATAGCCTGCCTGGT               | ChIP-qPCR                   |
| Os12g0113700              | LOC_Os12g02210 | TCTGACACGTGACCGTCT                | CTGTGAGATGCTGTCTTCCA              | ChIP-qPCR                   |
| pNL3-A                    | LOC_Os01g15640 | GCCTCGACCATGATATAGCAGATGTCT       | CGGGATCCCTGGGCTGTTTGTAAACGC       | Dual luciferase assay       |
| pNL3-B                    | LOC_Os01g15640 | GCCTCGACCATGATATAGCAGATGTCT       | CGGGATCCGTTGTTATGTGAAACGTACC      | Dual luciferase assay       |
| pNL3-C                    | LOC_Os01g15640 | GCCTCGACCATGATATAGCAGATGTCT       | CGGGATCCCTGGGCTGTTTGTAAACGC       | Dual luciferase assay       |
| pNL3-D                    | LOC_Os01g15640 | GCCTCGACCATGATATAGCAGATGTCT       | CGGGATCCGTAAGCTCAAAATCGCTTTCCG    | Dual luciferase assay       |
| pbZIP74-FULL              | LOC_Os06g41770 | GCCTCGACCTCTGGCAACCCGCTATCT       | CGGGATCCCGCGATGGAGATATTTTTGT      | Dual luciferase assay       |
| pbZIP74-1                 | LOC_Os06g41770 | GCCTCGACCTCTGGCAACCCGCTATCT       | CGGGATCCCGCGATGGAGATATTTTTGT      | Dual luciferase assay       |
| pbZIP74-2                 | LOC_Os06g41770 | GCCTCGACCTCTGGCAACCCGCTATCT       | CGGGATCCCGCGATGGAGATATTTTTGT      | Dual luciferase assay       |
| pbZIP74-3                 | LOC_Os06g41770 | GCCTCGACCTCTGGCAACCCGCTATCT       | CGGGATCCCGCGATGGAGATATTTTTGT      | Dual luciferase assay       |
| pbZIP74-4                 | LOC_Os06g41770 | GCCTCGACCTCTGGCAACCCGCTATCT       | CGGGATCCCGCGATGGAGATATTTTTGT      | Dual luciferase assay       |
| pbZIP74-5                 | LOC_Os06g41770 | GCCTCGACCTCTGGCAACCCGCTATCT       | CGGGATCCCGCTTGGGACTCCATTGAG       | Dual luciferase assay       |
| OsBZIP17ΔC                | LOC_Os05g34050 | GCCTCGACATGGCGGAGCCGGCCTGCT       | CGGGATCCCTATGCAAGCTTCTGGTCTTCC    | Dual luciferase assay       |
| OsBZIP16ΔC                | LOC_Os07g44950 | GCCTCGACATGGCGGAGCCGGCCTGCT       | CGGGATCCCTATGCAAGCTTCTGGTCTTCC    | Dual luciferase assay       |
| OsBZIP74A                 | LOC_Os06g41770 | CGGAATTCATGGATGATAGATTTCTGCC      | CGGGATCCCTAGCAAGCAGCTGTGCTAAA     | Dual luciferase assay       |
| OsNL3ΔC                   | LOC_Os01g15640 | CCCCGGGATGGAGTCTTTACGTGACA        | GCTCTAGACTACTGAATCCATCCAAACATCG   | Dual luciferase assay       |
| NL3-GFP                   | LOC_Os01g15640 | CCCCGGGATGGAGTCTTTACGTGACA        | TTTAGATCTAGAGGCTAGGTATGCTGCTGATC  | Subcellular localization    |
| NL3-deltaC                | LOC_Os01g15640 | TTAGATCTAGAGGCTAGGTATGCTGCTGATC   | GCTCTAGACTACTGAATCCATCCAAACATCG   | Subcellular localization    |
| CC1564-F10                | LOC_Os01g15640 | CGAATGAAGCTGCTGATAATGG            | NA                                | Sequencing                  |
| 1564-fl-R9                | LOC_Os01g15640 | NA                                | AGATCAGCAGCATACCTAGC              | Sequencing                  |
| 1564-fl-F9                | LOC_Os01g15640 | CCATGGAGTCTTACGTGACA              | NA                                | Sequencing                  |
| CC1564-R10                | LOC_Os01g15640 | NA                                | GTGCGATGTTCCAACCTCAGG             | Sequencing                  |
| ZIP74Fmex                 | LOC_Os06g41770 | CCGAGCATCTCCGACGAGT               | NA                                | Sequencing                  |
| Z74-cxR                   | LOC_Os06g41770 | NA                                | AGCCACCTCAATCTCTCCCTCCCGG         | Sequencing                  |
| ZIP17Fmex                 | LOC_Os05g34050 | CAACGACTCCGCTGCTCG                | NA                                | Sequencing                  |
| ZIP17Rmex                 | LOC_Os05g34050 | NA                                | TGCATACCCAGGCATCCAT               | Sequencing                  |
| ZIP16Fmex                 | LOC_Os07g44950 | GTCCGTGATCCCATCCACC               | NA                                | Sequencing                  |
| ZIP16Rmex                 | LOC_Os07g44950 | NA                                | CAATCAAGCAGGCTAACACC              | Sequencing                  |
